# Supplementary material for: Identification of UHRF2 as a novel DNA interstrand crosslink sensor protein
Source: PubMed Central journal article supplement (PMC6193622; doi:10.1371/journal.pgen.1007643), 2018-10-18

**Figure S1**

**A**

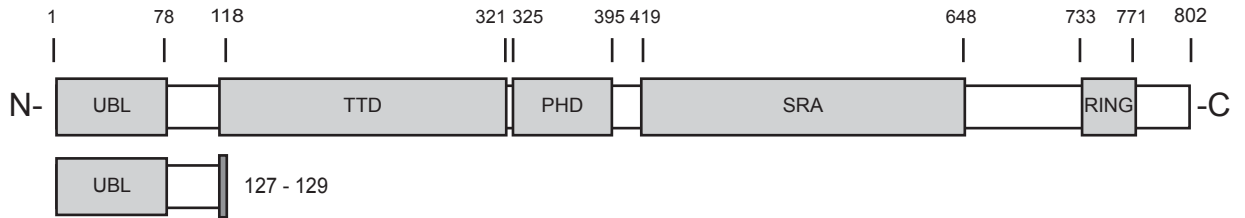

**B**

CGTGCCCGTCTTATTGATCCTGGCTTTGGAATATATAAGGTATG Genomic Sequence  
 CGTGCCCGTCTTATTG-TCCTGGCTTTGGAATATATAAGGTATG Allele 1 |Times detected: 2  
 CGTGCCCGTCTTATTGA--CTGGCTTTGGAATATATAAGGTATG Allele 2 |Times detected: 2  
 CGTGCCCGTCTTATTGA----GGCTTTGGAATATATAAGGTATG Allele 3 |Times detected: 3  
 CGTGCCCGTCTTATT--TCCTGGCTTTGGAATATATAAGGTATG Allele 4 |Times detected: 3

118 - RLIDPGFGIYKVNEL---> Endogenous Protein Sequence  
 118 - RLIVLALEYIR\* - 129 Allele 1  
 118 - RLIDWLWNI\* - 127 Allele 2  
 118 - RLIEALEYIR\* - 128 Allele 3  
 118 - RLISWLWNI\* - 127 Allele 4

**C**

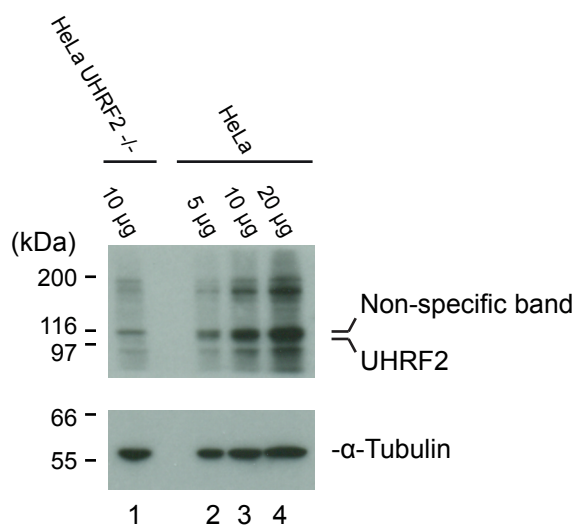

Supplement: pgen.1007643.s001.pdf [file pgen.1007643.s001.pdf]
