# Supplementary material for: Identification of UHRF2 as a novel DNA interstrand crosslink sensor protein
Source: PubMed Central journal article supplement (PMC6193622; doi:10.1371/journal.pgen.1007643), 2018-10-18

Figure S2

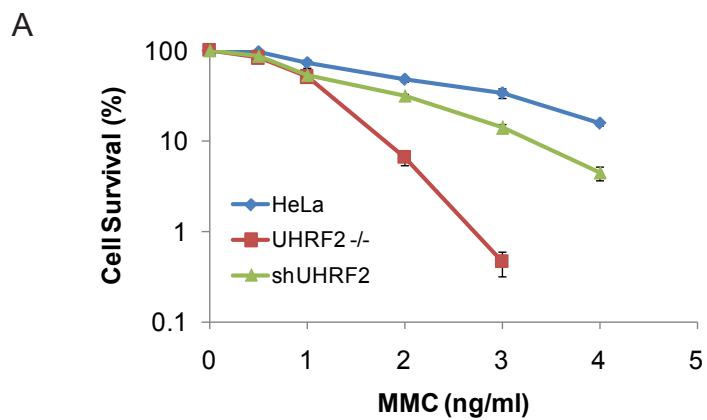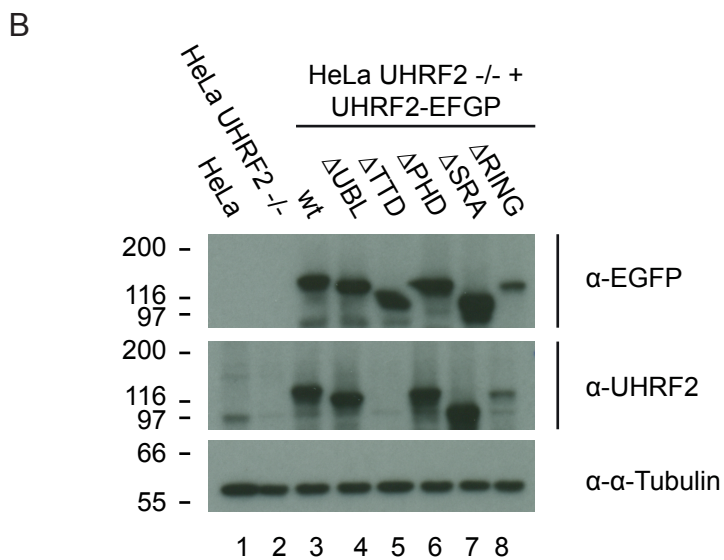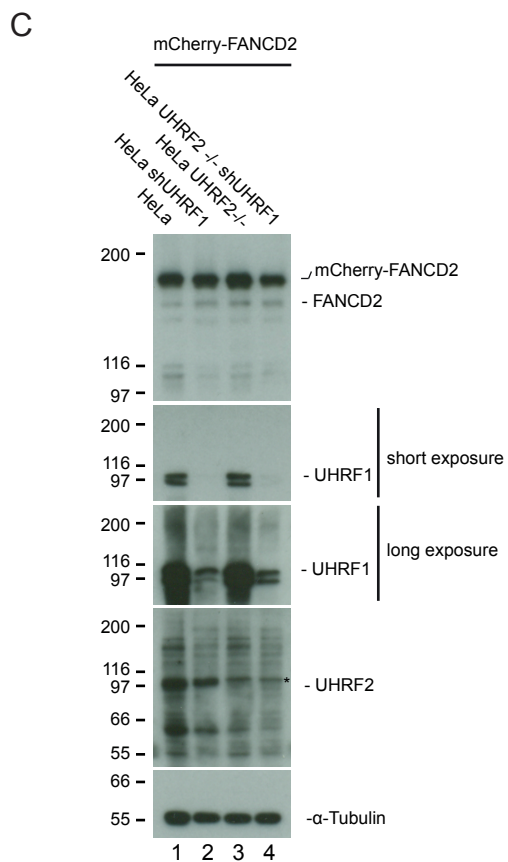

Supplement: pgen.1007643.s002.pdf [file pgen.1007643.s002.pdf]
