# Supplementary material for: Identification of UHRF2 as a novel DNA interstrand crosslink sensor protein
Source: PubMed Central journal article supplement (PMC6193622; doi:10.1371/journal.pgen.1007643), 2018-10-18

**Figure S6**

**A**

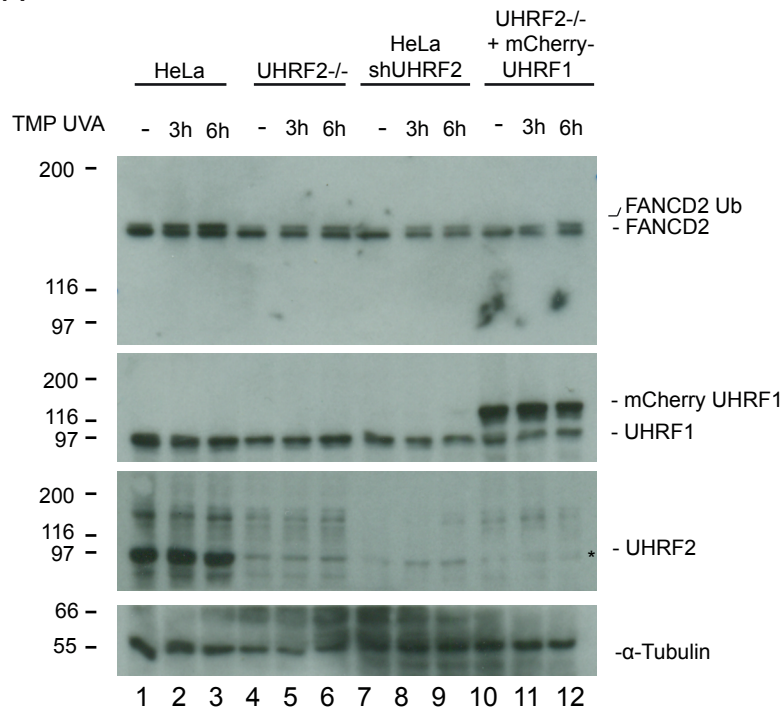

**B**

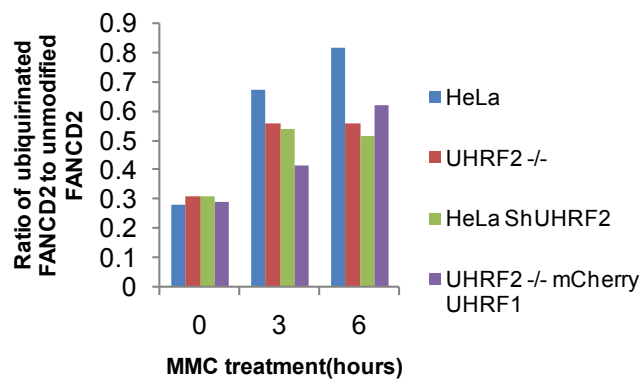

Supplement: pgen.1007643.s006.pdf [file pgen.1007643.s006.pdf]
