# Supplementary material for: Identification of UHRF2 as a novel DNA interstrand crosslink sensor protein
Source: PubMed Central journal article supplement (PMC6193622; doi:10.1371/journal.pgen.1007643), 2018-10-18
Supplement: pgen.1007643.s008.pdf [file pgen.1007643.s008.pdf]

| Compound | Adduct               | Precursor Ion ( <i>m/z</i> ) | MS1 Resolution | Product Ion ( <i>m/z</i> ) | MS2 Resolution | Retention Time (min) | Dwell Time (ms) | CE (V) | CA (V) | Polarity |
|----------|----------------------|------------------------------|----------------|----------------------------|----------------|----------------------|-----------------|--------|--------|----------|
| dC       | dC-H <sup>+</sup>    | 228                          | Unit           | 112                        | Unit           | 3.5                  | 500             | 10     | 4      | Positive |
|          | dC-Na <sup>+</sup>   | 250                          | Unit           | 134                        | Unit           | 3.5                  | 500             | 10     | 4      | Positive |
| 5hmdC    | hmdC-H <sup>+</sup>  | 258                          | Unit           | 142                        | Unit           | 4.1                  | 500             | 12     | 4      | Positive |
|          | hmdC-Na <sup>+</sup> | 280                          | Unit           | 164                        | Unit           | 4.1                  | 500             | 12     | 4      | Positive |
| 5mdC     | mdC-H <sup>+</sup>   | 242                          | Unit           | 126                        | Unit           | 8.7                  | 500             | 10     | 4      | Positive |
|          | mdC-Na <sup>+</sup>  | 264                          | Unit           | 148                        | Unit           | 8.7                  | 500             | 10     | 4      | Positive |
| dG       | dG-H <sup>+</sup>    | 268                          | Unit           | 152                        | Unit           | 9.4                  | 500             | 10     | 4      | Positive |
|          | dG-Na <sup>+</sup>   | 290                          | Unit           | 174                        | Unit           | 9.4                  | 500             | 10     | 4      | Positive |
| T        | dT-H <sup>+</sup>    | 243                          | Unit           | 127                        | Unit           | 10.9                 | 500             | 10     | 4      | Positive |
|          | dT-Na <sup>+</sup>   | 265                          | Unit           | 149                        | Unit           | 10.9                 | 500             | 10     | 4      | Positive |
| dA       | dA-H <sup>+</sup>    | 252                          | Unit           | 136                        | Unit           | 13.4                 | 500             | 10     | 4      | Positive |
|          | dA-Na <sup>+</sup>   | 274                          | Unit           | 158                        | Unit           | 13.4                 | 500             | 10     | 4      | Positive |
